# Supplementary material for: The impact of dihedral angle in aryl groups on the photocyclization reactivity of inverse-type diarylethenes
Source: Royal Society of Chemistry journal article supplement (doi:10.1039/d4tc04853a), 2025-01-01
Supplement: d4tc04853a1.xlsx [file d4tc04853a1.xlsx]

## Sheet: Sheet1
1	Table of Contents
2	Structure				Row
3	1o-AP1				22
4	1o-P1				77
5	1o-AP2				132
6	2o-AP1				187
7	2o-P1				248
8	2o-AP2				309
9	3o-AP1				370
10	3o-P1				437
11	3o-AP2				504
12	4o-AP1				571
13	4o-P1				644
14	4o-AP2				790
15	5o-AP1				869
16	5o-P1				948
17	5o-AP2				1027
18	6o-AP1				1100
19	6o-P1				1173
20	6o-AP2
21	Structure	Atom	x	y	z
22	1o-AP1
23		C	1.23295	2.803	0.006203
24		C	0.675094	1.39866	0.080694
25		C	-0.679942	1.41032	-0.105514
26		C	-1.20107	2.82994	-0.169418
27		C	0.007289	3.73054	0.188674
28		C	1.57401	0.285753	0.327355
29		C	1.41172	-0.803	1.17298
30		S	3.15423	0.254124	-0.44247
31		C	2.55752	-1.64751	1.17722
32		C	3.58961	-1.22906	0.367146
33		H	2.62913	-2.5255	1.81084
34		C	-1.58983	0.300569	-0.336745
35		C	-1.41732	-0.80905	-1.15447
36		S	-3.18179	0.283816	0.412531
37		C	-2.55899	-1.65851	-1.14774
38		C	-3.59943	-1.22453	-0.357008
39		H	-2.62119	-2.5516	-1.76096
40		C	-4.90199	-1.86413	-0.136585
41		C	-5.03454	-3.25973	-0.261815
42		C	-7.27282	-1.73619	0.399489
43		C	-6.26714	-3.87837	-0.069794
44		C	-7.39215	-3.12055	0.263443
45		H	-8.14208	-1.13607	0.654157
46		H	-6.3468	-4.95755	-0.169662
47		H	-8.35224	-3.60501	0.417708
48		C	4.89166	-1.86949	0.14778
49		C	5.03206	-3.26063	0.308899
50		C	6.02543	-1.12274	-0.220519
51		C	6.26529	-3.87873	0.119366
52		C	7.25545	-1.74553	-0.419234
53		H	5.94629	-0.044567	-0.330498
54		C	7.38278	-3.12518	-0.247277
55		H	6.3512	-4.95446	0.247228
56		H	8.11885	-1.14872	-0.700208
57		H	8.34327	-3.60944	-0.399703
58		C	0.214187	-1.06091	2.04562
59		H	-0.279375	-0.130848	2.34042
60		H	-0.535617	-1.67411	1.53028
61		H	0.512225	-1.59292	2.95505
62		C	-0.21665	-1.08424	-2.01784
63		H	0.278847	-0.160769	-2.32899
64		H	0.530666	-1.69026	-1.49072
65		H	-0.514275	-1.63182	-2.91819
66		F	1.81179	3.0367	-1.21483
67		F	2.17788	3.05457	0.946159
68		F	0.072346	4.83393	-0.5826
69		F	-0.073723	4.10674	1.48774
70		F	-1.66187	3.13785	-1.41326
71		F	-2.23199	3.04732	0.700518
72		C	-6.0433	-1.11313	0.19834
73		H	-5.97029	-0.032052	0.280184
74		H	-4.15951	-3.86113	-0.490021
75		H	4.16255	-3.85954	0.563215
76
77	1o-P1
78		C	1.88485	-3.02206	-0.084788
79		C	1.22522	-1.67667	0.140017
80		C	-0.134918	-1.81438	0.062116
81		C	-0.515613	-3.20586	-0.38976
82		C	0.815746	-3.85508	-0.829168
83		C	2.01188	-0.465156	0.300503
84		C	3.25289	-0.275295	0.897829
85		S	1.4522	1.02164	-0.457076
86		C	3.71757	1.06058	0.747206
87		C	2.87684	1.89352	0.042965
88		H	4.6488	1.40204	1.18694
89		C	-1.16526	-0.852281	0.41706
90		C	-1.2474	-0.072456	1.56341
91		S	-2.56574	-0.600878	-0.615138
92		C	-2.4238	0.725047	1.58131
93		C	-3.24397	0.569882	0.485364
94		H	-2.67757	1.36888	2.41709
95		C	-4.51815	1.2412	0.202645
96		C	-4.77769	2.5181	0.73487
97		C	-6.71314	1.28745	-0.848634
98		C	-5.9878	3.16087	0.487124
99		C	-6.96111	2.55014	-0.307018
100		H	-7.46453	0.800819	-1.4645
101		H	-6.16669	4.14733	0.906538
102		H	-7.90292	3.05482	-0.503531
103		C	3.06721	3.31043	-0.287817
104		C	4.36576	3.84511	-0.384394
105		C	1.97474	4.16753	-0.513507
106		C	4.56156	5.19057	-0.684165
107		C	2.17439	5.51095	-0.822821
108		H	0.96241	3.78209	-0.42724
109		C	3.46761	6.03028	-0.90621
110		H	5.57273	5.58191	-0.756595
111		H	1.3158	6.15523	-0.991314
112		H	3.62217	7.0787	-1.14533
113		C	4.05086	-1.30824	1.65167
114		H	3.41593	-1.96286	2.25236
115		H	4.6142	-1.95026	0.965022
116		H	4.76818	-0.818953	2.31748
117		C	-0.257984	-0.085846	2.69591
118		H	0.232052	-1.05917	2.79131
119		H	0.531135	0.662657	2.54985
120		H	-0.758726	0.139315	3.64326
121		F	2.17338	-3.65205	1.10038
122		F	3.03963	-2.95375	-0.793548
123		F	0.879628	-5.16899	-0.536158
124		F	0.983532	-3.69457	-2.16458
125		F	-1.0808	-3.93317	0.614773
126		F	-1.40898	-3.19321	-1.42214
127		C	-5.5076	0.637499	-0.594464
128		H	-5.33859	-0.356536	-0.999541
129		H	-4.01504	3.0146	1.32753
130		H	5.22368	3.19397	-0.246059
131
132	1o-AP2
133		C	-2.87003	-1.97101	0.349191
134		C	-1.69009	-1.04058	0.201846
135		C	-2.07419	0.180521	-0.27267
136		C	-3.5738	0.175624	-0.517177
137		C	-4.09336	-1.03633	0.292422
138		C	-0.33756	-1.53928	0.466005
139		C	0.236879	-1.90028	1.66809
140		S	0.751521	-1.83396	-0.876719
141		C	1.56748	-2.38659	1.49547
142		C	2.0066	-2.41527	0.192443
143		H	2.19621	-2.67596	2.33149
144		C	-1.26684	1.37172	-0.468575
145		C	-1.45415	2.45601	-1.32354
146		S	0.154698	1.61758	0.541012
147		C	-0.452827	3.44836	-1.14837
148		C	0.489022	3.1637	-0.184278
149		H	-0.415258	4.34486	-1.75819
150		C	1.63584	3.97782	0.234326
151		C	1.59191	5.37868	0.105231
152		C	3.87947	4.18047	1.15525
153		C	2.67744	6.16293	0.486387
154		C	3.82583	5.56849	1.01456
155		H	4.76966	3.70714	1.56043
156		H	2.62182	7.24306	0.38114
157		H	4.67031	6.1821	1.31562
158		C	3.30794	-2.86182	-0.321778
159		C	4.05	-3.83113	0.378243
160		C	3.84822	-2.33887	-1.51026
161		C	5.29291	-4.25125	-0.088664
162		C	5.08698	-2.76918	-1.98072
163		H	3.3017	-1.57572	-2.05785
164		C	5.81732	-3.72415	-1.27107
165		H	5.84803	-5.00272	0.46648
166		H	5.48596	-2.3499	-2.90042
167		H	6.78434	-4.05738	-1.6374
168		C	-0.4138	-1.76208	3.01937
169		H	-1.35166	-1.20563	2.96576
170		H	-0.638501	-2.74537	3.44992
171		H	0.253227	-1.24276	3.71731
172		C	-2.53327	2.61706	-2.36449
173		H	-2.68416	1.70393	-2.9443
174		H	-3.49539	2.87037	-1.90734
175		H	-2.26697	3.42161	-3.05603
176		F	-2.84973	-2.68962	1.50494
177		F	-2.92957	-2.87259	-0.675688
178		F	-4.40604	-0.628525	1.54868
179		F	-5.1791	-1.60708	-0.264304
180		F	-4.18901	1.32168	-0.127905
181		F	-3.8784	-0.026233	-1.83675
182		C	2.79884	3.39207	0.7666
183		H	2.86381	2.311	0.85481
184		H	0.691507	5.85228	-0.274559
185		H	3.63592	-4.27119	1.28058
186
187	2o-AP1
188		C	-1.23301	3.00377	-0.012601
189		C	-0.674628	1.59941	-0.082273
190		C	0.679651	1.61177	0.106202
191		C	1.19996	3.03161	0.17088
192		C	-0.007088	3.93098	-0.194219
193		C	-1.57412	0.48573	-0.326971
194		C	-1.41088	-0.603795	-1.17027
195		S	-3.15227	0.451149	0.443583
196		C	-2.55426	-1.45362	-1.16943
197		C	-3.58848	-1.03759	-0.361623
198		H	-2.62024	-2.33188	-1.80155
199		C	1.59061	0.502447	0.339248
200		C	1.41789	-0.604277	1.15963
201		S	3.17948	0.479065	-0.412861
202		C	2.55708	-1.45905	1.15021
203		C	3.59869	-1.0311	0.358501
204		H	2.61436	-2.34977	1.76557
205		C	4.92962	-1.62684	0.141011
206		C	5.11623	-3.01893	-0.052723
207		C	7.33558	-1.2714	-0.096709
208		C	6.4185	-3.49242	-0.257692
209		C	7.52177	-2.64132	-0.278485
210		H	8.18256	-0.591258	-0.109402
211		H	6.56415	-4.55862	-0.415441
212		H	8.51702	-3.04594	-0.441109
213		C	-4.9193	-1.63239	-0.142766
214		C	-5.11113	-3.02782	0.020152
215		C	-6.03686	-0.777455	-0.078737
216		C	-6.41366	-3.49933	0.227831
217		C	-7.32057	-1.2704	0.129549
218		H	-5.88943	0.289709	-0.218177
219		C	-7.51205	-2.64331	0.280669
220		H	-6.56335	-4.56819	0.361957
221		H	-8.16373	-0.586482	0.167684
222		H	-8.50763	-3.04661	0.444547
223		C	-3.97394	-4.02415	0.002559
224		H	-3.69315	-4.30778	-1.02025
225		H	-3.07437	-3.62781	0.48326
226		H	-4.26452	-4.94333	0.520912
227		C	-0.214687	-0.860941	-2.04512
228		H	0.277949	0.069388	-2.34056
229		H	0.536549	-1.47373	-1.53112
230		H	-0.513577	-1.39294	-2.95438
231		C	0.219046	-0.874964	2.02712
232		H	-0.275325	0.050133	2.33516
233		H	-0.530014	-1.48281	1.50432
234		H	0.517963	-1.41865	2.92949
235		F	-1.81491	3.24048	1.20625
236		F	-2.1757	3.25258	-0.955711
237		F	-0.074855	5.0372	0.572811
238		F	0.078336	4.30253	-1.49441
239		F	1.65393	3.34117	1.41706
240		F	2.23528	3.24859	-0.693574
241		C	3.97375	-4.00929	-0.070353
242		H	3.68053	-4.31509	0.942541
243		H	3.08138	-3.59695	-0.551062
244		H	4.26506	-4.91771	-0.606972
245		C	6.05216	-0.776652	0.10949
246		H	5.90873	0.287671	0.272726
247
248	2o-P1
249		C	0.683778	3.35356	-0.391487
250		C	0.251414	1.97953	0.067164
251		C	-1.11126	1.90102	0.170422
252		C	-1.71674	3.27273	-0.04705
253		C	-0.625563	4.05865	-0.810275
254		C	1.24586	0.972597	0.401353
255		C	1.31621	0.189947	1.54585
256		S	2.6077	0.652893	-0.660663
257		C	2.45153	-0.667233	1.53652
258		C	3.25549	-0.552637	0.424367
259		H	2.68877	-1.32207	2.36737
260		C	-1.94674	0.724605	0.350687
261		C	-3.1819	0.592109	0.973635
262		S	-1.47376	-0.785886	-0.415875
263		C	-3.71384	-0.720714	0.830488
264		C	-2.92884	-1.59402	0.112221
265		H	-4.65066	-1.01455	1.28979
266		C	-3.14112	-3.01787	-0.20461
267		C	-4.40064	-3.52396	-0.614991
268		C	-2.17762	-5.25513	-0.401393
269		C	-4.50552	-4.89144	-0.899798
270		C	-3.41785	-5.75631	-0.795003
271		H	-1.3172	-5.91278	-0.315275
272		H	-5.4677	-5.28132	-1.22378
273		H	-3.53841	-6.81121	-1.02591
274		C	4.51656	-1.24153	0.09461
275		C	4.6961	-2.63307	0.298404
276		C	5.57221	-0.490372	-0.457545
277		C	5.92776	-3.20203	-0.049757
278		C	6.78606	-1.07912	-0.796084
279		H	5.43687	0.577977	-0.600101
280		C	6.9676	-2.44581	-0.587362
281		H	6.06578	-4.27085	0.096939
282		H	7.58421	-0.472419	-1.2145
283		H	7.90889	-2.92302	-0.846167
284		C	3.61186	-3.53056	0.850936
285		H	3.57627	-3.50285	1.94793
286		H	2.6196	-3.24212	0.490937
287		H	3.79467	-4.57067	0.562934
288		C	0.355736	0.251508	2.70159
289		H	-0.085844	1.24688	2.80574
290		H	-0.471124	-0.45929	2.57699
291		H	0.867647	0.005107	3.63772
292		C	-3.91498	1.65965	1.74529
293		H	-3.23867	2.27547	2.34207
294		H	-4.45312	2.33593	1.07141
295		H	-4.64795	1.2035	2.41761
296		F	1.55981	3.3037	-1.4372
297		F	1.29446	4.05607	0.604293
298		F	-0.821693	3.90407	-2.14256
299		F	-0.628638	5.37448	-0.518634
300		F	-2.88469	3.25165	-0.73743
301		F	-1.96003	3.91645	1.14075
302		C	-5.62474	-2.65239	-0.782687
303		H	-6.14356	-2.48693	0.170643
304		H	-5.37428	-1.66706	-1.18692
305		H	-6.34185	-3.12918	-1.45819
306		C	-2.04773	-3.90099	-0.111983
307		H	-1.08668	-3.51278	0.213311
308
309	2o-AP2
310		C	3.72178	-0.536292	0.477999
311		C	2.22919	-0.373109	0.243839
312		C	1.98063	0.884124	-0.223235
313		C	3.25508	1.6792	-0.37541
314		C	4.36783	0.614774	-0.329551
315		C	1.29289	-1.46686	0.444836
316		C	1.36058	-2.56032	1.3047
317		S	-0.159813	-1.5487	-0.544625
318		C	0.250002	-3.43374	1.14182
319		C	-0.655387	-3.05621	0.176172
320		H	0.149044	-4.34653	1.71758
321		C	0.689706	1.53008	-0.482524
322		C	0.143812	1.92328	-1.68679
323		S	-0.3424	1.97559	0.861473
324		C	-1.11945	2.56723	-1.51293
325		C	-1.53141	2.68891	-0.207458
326		H	-1.69256	2.95683	-2.34704
327		C	-2.74062	3.32577	0.350112
328		C	-4.02838	3.12119	-0.205055
329		C	-3.70708	4.77844	2.06007
330		C	-5.11953	3.7641	0.393942
331		C	-4.97368	4.58638	1.50954
332		H	-3.57258	5.41533	2.92992
333		H	-6.11052	3.6027	-0.024274
334		H	-5.84413	5.0674	1.94747
335		C	-1.87886	-3.73529	-0.289875
336		C	-2.81355	-4.31301	0.605633
337		C	-2.12939	-3.79664	-1.67412
338		C	-3.94868	-4.9347	0.069607
339		C	-3.26453	-4.42009	-2.18179
340		H	-1.4038	-3.36469	-2.35753
341		C	-4.18061	-4.99723	-1.30311
342		H	-4.67298	-5.37102	0.753587
343		H	-3.42757	-4.45864	-3.25519
344		H	-5.07326	-5.48812	-1.68121
345		C	-2.65199	-4.26623	2.10833
346		H	-1.99811	-5.06847	2.47465
347		H	-2.21842	-3.31977	2.44481
348		H	-3.62147	-4.3944	2.59989
349		C	2.43073	-2.85117	2.32688
350		H	3.3553	-3.19663	1.85331
351		H	2.68379	-1.96825	2.91815
352		H	2.08979	-3.63389	3.01062
353		C	0.76505	1.69336	-3.03938
354		H	1.06162	2.64243	-3.50218
355		H	1.65669	1.06619	-2.97718
356		H	0.051372	1.20815	-3.71569
357		F	4.20314	-1.74145	0.078153
358		F	4.05555	-0.377326	1.79615
359		F	4.62663	0.180968	-1.5894
360		F	5.51321	1.05905	0.223137
361		F	3.30587	2.39859	-1.52964
362		F	3.42063	2.5658	0.65105
363		C	-4.27687	2.22491	-1.39722
364		H	-4.08855	2.74424	-2.34604
365		H	-3.63463	1.33926	-1.38379
366		H	-5.32021	1.89429	-1.41492
367		C	-2.60754	4.15186	1.48218
368		H	-1.61711	4.31633	1.89718
369
370	3o-AP1
371		C	1.23166	3.26578	0.001283
372		C	0.6747	1.86108	0.074871
373		C	-0.681771	1.87328	-0.096188
374		C	-1.20329	3.29305	-0.151882
375		C	0.007822	4.19223	0.199851
376		C	1.57801	0.747206	0.305177
377		C	1.42764	-0.342711	1.15002
378		S	3.14605	0.714543	-0.486206
379		C	2.57314	-1.19048	1.13456
380		C	3.59422	-0.773995	0.311381
381		H	2.65129	-2.06783	1.76689
382		C	-1.59562	0.764053	-0.319134
383		C	-1.43425	-0.340243	-1.14478
384		S	-3.17525	0.739132	0.452587
385		C	-2.57504	-1.19362	-1.12466
386		C	-3.60466	-0.768329	-0.31706
387		H	-2.64323	-2.08151	-1.74337
388		C	-4.93768	-1.35827	-0.081399
389		C	-5.13123	-2.73067	0.213542
390		C	-7.3466	-0.97995	0.090599
391		C	-6.44014	-3.18342	0.434001
392		C	-7.54037	-2.33256	0.373267
393		H	-8.19151	-0.299033	0.038887
394		H	-6.59123	-4.23395	0.673892
395		H	-8.5394	-2.72084	0.552167
396		C	4.92685	-1.36204	0.070617
397		C	5.12515	-2.7398	-0.195097
398		C	6.0432	-0.501155	0.084219
399		C	6.43392	-3.18942	-0.422758
400		C	7.33078	-0.972978	-0.143109
401		H	5.88851	0.552287	0.299242
402		C	7.52935	-2.33065	-0.396832
403		H	6.58855	-4.24427	-0.640312
404		H	8.17188	-0.285869	-0.118874
405		H	8.52832	-2.71689	-0.580342
406		C	4.0019	-3.75682	-0.269781
407		H	3.04449	-3.25434	-0.434028
408		H	4.17213	-4.39724	-1.14502
409		C	0.243803	-0.601568	2.04098
410		H	-0.246634	0.328021	2.34237
411		H	-0.513084	-1.21611	1.53747
412		H	0.555702	-1.13253	2.94648
413		C	-0.247083	-0.608971	-2.02874
414		H	0.244414	0.316732	-2.33956
415		H	0.507941	-1.21973	-1.51806
416		H	-0.558193	-1.14889	-2.92925
417		F	1.79857	3.50524	-1.22408
418		F	2.1858	3.51294	0.93332
419		F	0.065672	5.29993	-0.565894
420		F	-0.061597	4.56138	1.5017
421		F	-1.67271	3.60469	-1.39186
422		F	-2.22796	3.50813	0.725622
423		C	-4.00252	-3.73804	0.326937
424		H	-3.05053	-3.22517	0.490652
425		H	-4.17953	-4.35821	1.21534
426		C	-6.05892	-0.505152	-0.130304
427		H	-5.90777	0.543968	-0.367723
428		C	-3.88437	-4.66569	-0.896413
429		H	-3.06748	-5.38389	-0.76125
430		H	-4.8094	-5.23177	-1.05291
431		H	-3.69074	-4.10004	-1.81475
432		C	3.90553	-4.65523	0.977094
433		H	3.09172	-5.38159	0.869966
434		H	4.83622	-5.21151	1.1351
435		H	3.72015	-4.0688	1.88405
436
437	3o-P1
438		C	-1.55587	3.49911	0.025972
439		C	-0.980662	2.1076	0.194097
440		C	0.381061	2.15541	0.065194
441		C	0.838515	3.53049	-0.365065
442		C	-0.460829	4.27832	-0.7385
443		C	-1.8419	0.947492	0.359562
444		C	-3.06476	0.827388	1.00823
445		S	-1.42591	-0.551444	-0.460976
446		C	-3.63247	-0.468152	0.841674
447		C	-2.88836	-1.33757	0.077635
448		H	-4.56398	-0.754661	1.31665
449		C	1.35628	1.11552	0.352227
450		C	1.42974	0.301684	1.47433
451		S	2.69041	0.792116	-0.743619
452		C	2.54563	-0.579909	1.42155
453		C	3.32919	-0.456188	0.296564
454		H	2.78588	-1.26011	2.23111
455		C	4.5705	-1.16141	-0.080569
456		C	4.70477	-2.57042	-0.014097
457		C	6.85436	-0.982299	-0.933158
458		C	5.92407	-3.13984	-0.408901
459		C	6.99187	-2.36897	-0.860335
460		H	7.67514	-0.362671	-1.28335
461		H	6.02622	-4.22252	-0.371741
462		H	7.92053	-2.84737	-1.15966
463		C	-3.1391	-2.74828	-0.278246
464		C	-4.38736	-3.20718	-0.767782
465		C	-2.07757	-3.66649	-0.145919
466		C	-4.51429	-4.56681	-1.08752
467		C	-2.23046	-5.00979	-0.468968
468		H	-1.1247	-3.31207	0.236778
469		C	-3.46148	-5.46593	-0.941742
470		H	-5.46707	-4.92022	-1.47633
471		H	-1.39559	-5.69473	-0.34994
472		H	-3.59864	-6.5118	-1.2028
473		C	-5.58995	-2.30949	-0.990434
474		H	-5.27761	-1.26354	-1.05387
475		H	-6.03379	-2.56117	-1.96236
476		C	-3.75165	1.8899	1.82782
477		H	-3.04579	2.47019	2.42606
478		H	-4.28707	2.59951	1.18684
479		H	-4.48083	1.43304	2.50375
480		C	0.493269	0.355186	2.65002
481		H	0.078366	1.35776	2.78912
482		H	-0.353199	-0.331694	2.52294
483		H	1.01661	0.071323	3.56905
484		F	-1.75872	4.116	1.23548
485		F	-2.73782	3.52557	-0.639891
486		F	-0.425279	5.58565	-0.41263
487		F	-0.686996	4.16411	-2.0701
488		F	1.48569	4.19064	0.636647
489		F	1.6926	3.48779	-1.42912
490		C	3.59731	-3.50335	0.43849
491		H	2.62812	-3.00081	0.374235
492		H	3.55519	-4.353	-0.2555
493		C	5.65538	-0.392867	-0.549074
494		H	5.55195	0.687701	-0.588788
495		C	3.80166	-4.05033	1.86332
496		H	2.98684	-4.72976	2.13888
497		H	4.74412	-4.6037	1.94233
498		H	3.83579	-3.24365	2.60419
499		C	-6.67516	-2.46006	0.091579
500		H	-7.52742	-1.80475	-0.121221
501		H	-7.04475	-3.49053	0.139517
502		H	-6.29199	-2.20612	1.0864
503
504	3o-AP2
505		C	0.683154	3.6521	-0.267354
506		C	0.288209	2.20112	-0.13157
507		C	-1.00749	2.0741	0.277512
508		C	-1.60715	3.45405	0.486564
509		C	-0.660372	4.40638	-0.281869
510		C	1.29252	1.1532	-0.335655
511		C	1.91664	0.761336	-1.50213
512		S	1.91777	0.275224	1.04653
513		C	2.8809	-0.267104	-1.26991
514		C	3.01067	-0.652733	0.04264
515		H	3.43809	-0.734012	-2.07478
516		C	-1.79246	0.861778	0.437628
517		C	-2.89487	0.606021	1.24875
518		S	-1.42615	-0.536677	-0.564972
519		C	-3.41192	-0.703434	1.04523
520		C	-2.7485	-1.45486	0.101828
521		H	-4.24371	-1.0896	1.62331
522		C	-2.97721	-2.84375	-0.343083
523		C	-4.25966	-3.33958	-0.686208
524		C	-1.99182	-5.01705	-0.873008
525		C	-4.36278	-4.67254	-1.10969
526		C	-3.25474	-5.51034	-1.20278
527		H	-1.11427	-5.65398	-0.939819
528		H	-5.34369	-5.05317	-1.38688
529		H	-3.37541	-6.53722	-1.53714
530		C	3.86725	-1.69048	0.653042
531		C	5.25365	-1.7995	0.382901
532		C	3.27506	-2.59109	1.56109
533		C	5.97641	-2.81563	1.02521
534		C	4.01401	-3.59012	2.1846
535		H	2.21034	-2.50701	1.76002
536		C	5.37762	-3.70616	1.91207
537		H	7.04395	-2.8945	0.8299
538		H	3.528	-4.2733	2.87562
539		H	5.97214	-4.47856	2.39258
540		C	6.00834	-0.865716	-0.544421
541		H	5.44492	0.059745	-0.69175
542		H	6.95136	-0.583139	-0.058607
543		C	1.60711	1.29339	-2.87678
544		H	1.42536	0.469845	-3.57724
545		H	0.727391	1.94005	-2.87532
546		H	2.44625	1.87972	-3.27039
547		C	-3.50342	1.53123	2.27234
548		H	-2.74412	2.02232	2.88489
549		H	-4.09332	2.32177	1.79671
550		H	-4.16734	0.969303	2.93568
551		F	1.40787	3.91139	-1.39006
552		F	1.43578	4.06965	0.79379
553		F	-1.09529	4.52566	-1.56209
554		F	-0.592843	5.63246	0.272204
555		F	-2.88301	3.56352	0.034972
556		F	-1.60634	3.81993	1.80608
557		C	-5.52687	-2.50625	-0.645611
558		H	-5.28233	-1.44051	-0.655536
559		H	-6.09931	-2.70264	-1.56147
560		C	-1.86151	-3.69868	-0.451919
561		H	-0.881906	-3.31723	-0.178546
562		C	-6.42627	-2.8185	0.564629
563		H	-7.33372	-2.20443	0.541191
564		H	-6.73041	-3.8712	0.569386
565		H	-5.91026	-2.62547	1.51193
566		C	6.33621	-1.49316	-1.9118
567		H	6.89445	-0.787626	-2.53773
568		H	6.94473	-2.39715	-1.79614
569		H	5.42721	-1.78022	-2.45234
570
571	4o-AP1
572		C	1.23074	3.49076	0.032372
573		C	0.672565	2.08577	0.090949
574		C	-0.679184	2.09774	-0.114336
575		C	-1.19938	3.51749	-0.182608
576		C	0.00206	4.41679	0.200287
577		C	1.57065	0.97259	0.344074
578		C	1.39953	-0.11781	1.18455
579		S	3.16043	0.943031	-0.404386
580		C	2.54716	-0.963078	1.20013
581		C	3.58765	-0.544369	0.403446
582		H	2.61301	-1.84248	1.83241
583		C	-1.58747	0.989027	-0.361412
584		C	-1.40562	-0.11466	-1.1838
585		S	-3.18776	0.965176	0.368146
586		C	-2.54808	-0.966347	-1.19494
587		C	-3.5965	-0.54052	-0.412792
588		H	-2.60404	-1.85555	-1.81438
589		C	-4.94121	-1.12787	-0.23181
590		C	-5.15109	-2.48434	0.122162
591		C	-7.35572	-0.759503	-0.299258
592		C	-6.47424	-2.93811	0.22973
593		C	-7.56694	-2.1002	0.022726
594		H	-8.19549	-0.089815	-0.462019
595		H	-6.65295	-3.97706	0.493969
596		H	-8.57633	-2.49179	0.116452
597		C	4.93296	-1.12828	0.218075
598		C	5.14672	-2.49052	-0.110679
599		C	6.04369	-0.27625	0.381155
600		C	6.47129	-2.93891	-0.223356
601		C	7.34581	-0.744864	0.251066
602		H	5.86998	0.76462	0.638723
603		C	7.56122	-2.0908	-0.045494
604		H	6.65321	-3.98201	-0.468289
605		H	8.18343	-0.067301	0.390611
606		H	8.57179	-2.47857	-0.142239
607		C	4.00979	-3.47438	-0.375191
608		H	3.07055	-2.91441	-0.356731
609		C	0.192496	-0.378703	2.04318
610		H	-0.305704	0.550256	2.33367
611		H	-0.550781	-0.991848	1.51812
612		H	0.480305	-0.911926	2.95528
613		C	-0.195652	-0.383633	-2.03617
614		H	0.303509	0.542055	-2.33466
615		H	0.545886	-0.993653	-1.50521
616		H	-0.482913	-0.924404	-2.94406
617		F	1.82868	3.73108	-1.17798
618		F	2.16076	3.7377	0.98858
619		F	0.079065	5.52495	-0.563081
620		F	-0.100523	4.78515	1.50018
621		F	-1.63719	3.82961	-1.434
622		F	-2.24617	3.73193	0.668578
623		C	-4.01154	-3.45611	0.418429
624		H	-3.07528	-2.8912	0.398231
625		C	-6.05484	-0.286009	-0.424778
626		H	-5.88426	0.75033	-0.701897
627		C	-3.91108	-4.55702	-0.655628
628		H	-3.06039	-5.21837	-0.451797
629		H	-4.81641	-5.17527	-0.678451
630		H	-3.77916	-4.13103	-1.65679
631		C	-4.1318	-4.07181	1.82632
632		H	-4.18523	-3.29378	2.59544
633		H	-5.02419	-4.70066	1.92382
634		H	-3.26035	-4.7023	2.03945
635		C	4.11898	-4.11787	-1.77151
636		H	4.16016	-3.35534	-2.55674
637		H	5.01371	-4.74389	-1.86557
638		H	3.24881	-4.75709	-1.96268
639		C	3.92677	-4.55385	0.721922
640		H	4.83574	-5.1666	0.747708
641		H	3.80288	-4.10846	1.71565
642		H	3.07774	-5.22375	0.540382
643
644	4o-P1
645		C	0.893182	3.70153	-0.424931
646		C	0.453639	2.34384	0.073859
647		C	-0.902425	2.30088	0.253791
648		C	-1.48536	3.68479	0.052092
649		C	-0.419754	4.43356	-0.78117
650		C	1.44054	1.31573	0.363853
651		C	1.5575	0.545227	1.51265
652		S	2.73378	0.951142	-0.768507
653		C	2.6724	-0.337524	1.45108
654		C	3.4105	-0.256924	0.292381
655		H	2.94615	-0.98969	2.27405
656		C	-1.7556	1.1481	0.495693
657		C	-2.95592	1.05466	1.18953
658		S	-1.36539	-0.383943	-0.276658
659		C	-3.52753	-0.246688	1.09409
660		C	-2.80872	-1.14447	0.339657
661		H	-4.44404	-0.516953	1.60809
662		C	-3.07165	-2.57337	0.066781
663		C	-4.30876	-3.04617	-0.438665
664		C	-2.20666	-4.85769	0.122999
665		C	-4.45693	-4.42909	-0.622766
666		C	-3.43177	-5.33034	-0.347722
667		H	-1.39403	-5.54554	0.339539
668		H	-5.40099	-4.80924	-1.00393
669		H	-3.58797	-6.39423	-0.504982
670		C	4.64721	-0.970976	-0.09061
671		C	4.76763	-2.38259	-0.047342
672		C	5.74622	-0.198188	-0.515701
673		C	6.00235	-2.94777	-0.399772
674		C	6.95482	-0.785766	-0.87134
675		H	5.64569	0.883124	-0.540418
676		C	7.08624	-2.17288	-0.804465
677		H	6.1137	-4.02839	-0.366176
678		H	7.7884	-0.164916	-1.18748
679		H	8.02567	-2.65053	-1.06976
680		C	3.61325	-3.30677	0.331838
681		H	2.71839	-2.69097	0.457873
682		C	0.665495	0.64307	2.71962
683		H	0.252353	1.64938	2.83476
684		H	-0.18261	-0.050174	2.65137
685		H	1.22384	0.396638	3.62881
686		C	-3.61641	2.14922	1.98837
687		H	-4.1794	2.82869	1.33836
688		H	-4.3172	1.71934	2.71048
689		H	-2.89139	2.7571	2.5338
690		F	1.70978	3.61844	-1.51566
691		F	1.57354	4.40024	0.527494
692		F	-0.692966	4.26646	-2.09835
693		F	-0.375048	5.75278	-0.508911
694		F	-2.6905	3.68505	-0.571418
695		F	-1.64541	4.34885	1.24291
696		C	-5.4632	-2.12246	-0.819064
697		H	-5.11629	-1.09071	-0.715522
698		C	-2.03614	-3.49323	0.326393
699		H	-1.09304	-3.12086	0.716228
700		C	-6.66882	-2.30302	0.124169
701		H	-7.46942	-1.60047	-0.136033
702		H	-7.07985	-3.31743	0.056905
703		H	-6.39087	-2.12993	1.1702
704		C	-5.88437	-2.30594	-2.29035
705		H	-5.0351	-2.15963	-2.96627
706		H	-6.29448	-3.30498	-2.47804
707		H	-6.65892	-1.57661	-2.55505
708		C	3.30199	-4.32414	-0.783394
709		H	3.09474	-3.81917	-1.73289
710		H	4.13313	-5.01964	-0.947659
711		H	2.42143	-4.9207	-0.516615
712		C	3.8762	-4.02264	1.67127
713		H	4.75652	-4.67356	1.60969
714		H	4.05339	-3.30646	2.48177
715		H	3.01868	-4.64689	1.94998
716
717	4o-AP2
718		C	3.93293	1.28745	-0.224309
719		C	2.55402	0.675544	-0.163259
720		C	2.60746	-0.640727	0.189844
721		C	4.05402	-1.03896	0.429999
722		C	4.88013	0.072771	-0.259918
723		C	1.37517	1.52133	-0.377797
724		C	0.923144	2.10036	-1.54529
725		S	0.379199	1.98219	0.989452
726		C	-0.240557	2.90101	-1.32565
727		C	-0.667459	2.95144	-0.021474
728		H	-0.7352	3.44733	-2.12254
729		C	1.51879	-1.60069	0.275364
730		C	1.4022	-2.76066	1.0367
731		S	0.103391	-1.39053	-0.749958
732		C	0.185396	-3.44969	0.77171
733		C	-0.623914	-2.86255	-0.172738
734		H	-0.069052	-4.38455	1.2601
735		C	-1.91147	-3.32931	-0.732257
736		C	-3.02931	-3.65248	0.075889
737		C	-3.17477	-3.91097	-2.73962
738		C	-4.18707	-4.12151	-0.563004
739		C	-4.26957	-4.25541	-1.94657
740		H	-3.222	-4.0069	-3.82077
741		H	-5.05247	-4.37945	0.041759
742		H	-5.18525	-4.62291	-2.40217
743		C	-1.78702	3.71199	0.57842
744		C	-3.12426	3.59571	0.125803
745		C	-1.49199	4.58361	1.64454
746		C	-4.09924	4.39163	0.746201
747		C	-2.4801	5.3521	2.24992
748		H	-0.462256	4.66695	1.98056
749		C	-3.79409	5.26075	1.79045
750		H	-5.12941	4.31989	0.407076
751		H	-2.2239	6.02265	3.06547
752		H	-4.57903	5.85968	2.2447
753		C	-3.54776	2.62879	-0.976815
754		H	-2.67455	2.03021	-1.25073
755		C	1.54148	1.91249	-2.90567
756		H	2.33201	1.15942	-2.8938
757		H	0.784136	1.60293	-3.63553
758		H	1.98339	2.84818	-3.26909
759		C	2.38609	-3.2867	2.05151
760		H	2.74295	-2.50156	2.72191
761		H	1.91535	-4.06589	2.65787
762		H	3.26701	-3.72175	1.56845
763		F	4.19588	2.04679	0.880838
764		F	4.11783	2.09073	-1.30735
765		F	6.06186	0.295809	0.347123
766		F	5.10838	-0.281226	-1.55028
767		F	4.3706	-1.04639	1.76192
768		F	4.3682	-2.26165	-0.070176
769		C	-3.03742	-3.48135	1.59276
770		H	-2.09369	-3.01092	1.8826
771		C	-2.01094	-3.45366	-2.13183
772		H	-1.14559	-3.20724	-2.74056
773		C	-3.11968	-4.8392	2.3173
774		H	-3.07853	-4.69843	3.40393
775		H	-4.05555	-5.36073	2.08359
776		H	-2.29418	-5.49962	2.02809
777		C	-4.16706	-2.54114	2.05706
778		H	-4.10137	-1.56764	1.55901
779		H	-5.15896	-2.95834	1.84803
780		H	-4.10022	-2.37464	3.1386
781		C	-4.63121	1.64516	-0.493042
782		H	-4.2977	1.09546	0.394105
783		H	-5.56597	2.15775	-0.237626
784		H	-4.85849	0.915494	-1.27909
785		C	-4.01115	3.37759	-2.24174
786		H	-4.89844	3.99003	-2.04109
787		H	-3.22953	4.04551	-2.62147
788		H	-4.26832	2.66766	-3.03695
789
790	5o-AP1
791		C	1.22804	3.48789	0.07009
792		C	0.669848	2.08142	0.110013
793		C	-0.674525	2.09215	-0.138796
794		C	-1.1917	3.51245	-0.230012
795		C	-0.005712	4.41359	0.192567
796		C	1.56674	0.974044	0.396496
797		C	1.3772	-0.11211	1.23629
798		S	3.19001	0.962761	-0.282016
799		C	2.537	-0.942493	1.30424
800		C	3.59552	-0.526121	0.535522
801		H	2.59355	-1.80934	1.95402
802		C	-1.58043	0.987436	-0.415952
803		C	-1.37843	-0.116282	-1.23137
804		S	-3.21515	0.984647	0.238744
805		C	-2.53255	-0.954249	-1.29314
806		C	-3.60048	-0.527102	-0.543781
807		H	-2.57752	-1.835	-1.92496
808		C	-4.99572	-1.05236	-0.499858
809		C	-5.45116	-2.18634	0.232146
810		C	-7.24573	-0.667336	-1.39105
811		C	-6.81118	-2.51508	0.091396
812		C	-7.69752	-1.78458	-0.698358
813		H	-7.91828	-0.078362	-2.00819
814		H	-7.20782	-3.37029	0.622547
815		H	-8.73804	-2.09225	-0.760931
816		C	4.99276	-1.04482	0.485851
817		C	5.44482	-2.1974	-0.218773
818		C	5.90833	-0.279802	1.23339
819		C	6.80838	-2.51475	-0.086179
820		C	7.2523	-0.621199	1.33449
821		H	5.53671	0.598129	1.75398
822		C	7.70092	-1.75657	0.669751
823		H	7.20286	-3.38317	-0.597096
824		H	7.92972	-0.010426	1.9245
825		H	8.74383	-2.057	0.727676
826		C	4.54599	-3.10032	-1.10541
827		C	0.143153	-0.383582	2.05137
828		H	-0.386135	0.539011	2.30459
829		H	-0.564578	-1.02347	1.50941
830		H	0.405429	-0.894689	2.9837
831		C	-0.13988	-0.399372	-2.03591
832		H	0.388985	0.5192	-2.30346
833		H	0.56643	-1.03015	-1.48175
834		H	-0.399149	-0.926011	-2.96045
835		F	1.86961	3.72709	-1.11766
836		F	2.12219	3.73675	1.05953
837		F	0.097498	5.51988	-0.570325
838		F	-0.15439	4.78495	1.4871
839		F	-1.58403	3.81967	-1.49765
840		F	-2.2683	3.72998	0.582015
841		C	-4.55852	-3.05853	1.15502
842		C	-5.90496	-0.315582	-1.28249
843		H	-5.53098	0.548401	-1.82428
844		C	-3.55483	-3.88412	0.31377
845		H	-2.99335	-4.56585	0.964736
846		H	-4.07757	-4.48939	-0.435973
847		H	-2.83365	-3.24774	-0.201366
848		C	-5.39077	-4.07057	1.9762
849		H	-6.15083	-3.57675	2.59182
850		H	-5.88678	-4.81569	1.34472
851		H	-4.72152	-4.61517	2.65096
852		C	5.37463	-4.12772	-1.91115
853		H	6.12306	-3.64493	-2.54934
854		H	5.88408	-4.85295	-1.26733
855		H	4.7004	-4.6941	-2.56259
856		C	3.56029	-3.91077	-0.228887
857		H	4.09769	-4.49099	0.53024
858		H	2.8402	-3.26653	0.277875
859		H	2.9964	-4.61458	-0.853727
860		C	3.75971	-2.26436	-2.142
861		H	3.05661	-1.57279	-1.67629
862		H	4.4401	-1.68071	-2.77287
863		H	3.18556	-2.93243	-2.79539
864		C	-3.79294	-2.18931	2.17971
865		H	-3.08933	-1.50411	1.70539
866		H	-4.4865	-1.59512	2.78594
867		H	-3.22235	-2.83523	2.85804
868
869	5o-P1
870		C	-1.47419	3.79697	-0.004106
871		C	-0.891422	2.42956	0.291168
872		C	0.459905	2.45243	0.081124
873		C	0.894802	3.76798	-0.523191
874		C	-0.422143	4.47594	-0.911275
875		C	-1.74338	1.30187	0.638617
876		C	-2.93135	1.2692	1.35624
877		S	-1.36966	-0.290892	-0.012411
878		C	-3.51261	-0.034463	1.36808
879		C	-2.82308	-0.984806	0.65739
880		H	-4.41669	-0.260951	1.9228
881		C	1.44883	1.44122	0.423389
882		C	1.59303	0.764357	1.62487
883		S	2.70756	0.974889	-0.712361
884		C	2.6974	-0.13764	1.5995
885		C	3.38548	-0.174727	0.411578
886		H	2.99522	-0.719204	2.46543
887		C	4.64771	-0.888989	0.068703
888		C	4.769	-2.26881	-0.263345
889		C	7.06335	-0.567039	-0.183252
890		C	6.06982	-2.73447	-0.525944
891		C	7.19789	-1.91652	-0.488674
892		H	7.92675	0.091614	-0.153886
893		H	6.21917	-3.77562	-0.780197
894		H	8.17477	-2.34085	-0.705453
895		C	-3.06459	-2.45073	0.546426
896		C	-4.03888	-3.08007	-0.28026
897		C	-2.22081	-3.23579	1.35479
898		C	-4.10912	-4.48268	-0.202351
899		C	-2.316	-4.62204	1.39991
900		H	-1.48196	-2.72792	1.96813
901		C	-3.27725	-5.2472	0.613811
902		H	-4.83447	-5.01125	-0.806784
903		H	-1.65265	-5.19674	2.04017
904		H	-3.38365	-6.32881	0.62413
905		C	-5.01171	-2.33159	-1.23126
906		C	-3.57598	2.42399	2.07965
907		H	-2.84053	3.07466	2.55728
908		H	-4.15643	3.04805	1.39049
909		H	-4.25877	2.05267	2.84996
910		C	0.739463	0.967557	2.84626
911		H	0.327147	1.97989	2.88644
912		H	-0.108345	0.270653	2.86545
913		H	1.3266	0.800968	3.75556
914		F	-1.60967	4.55009	1.13552
915		F	-2.69074	3.75477	-0.603395
916		F	-0.36953	5.8119	-0.741668
917		F	-0.719293	4.20938	-2.2067
918		F	1.59124	4.53252	0.365032
919		F	1.69409	3.60173	-1.61686
920		C	3.58285	-3.26746	-0.344152
921		C	5.79331	-0.071179	0.089258
922		H	5.66821	0.978683	0.338472
923		C	3.06692	-3.59862	1.07761
924		H	2.28625	-4.36761	1.02225
925		H	3.87649	-3.98402	1.7084
926		H	2.6363	-2.72381	1.56778
927		C	4.00293	-4.60759	-0.992313
928		H	4.41934	-4.46658	-1.99603
929		H	4.73363	-5.15641	-0.388323
930		H	3.1195	-5.24811	-1.08672
931		C	-5.72484	-3.30248	-2.20183
932		H	-5.01319	-3.88481	-2.79789
933		H	-6.39469	-3.99827	-1.68519
934		H	-6.34145	-2.72118	-2.89557
935		C	-6.11695	-1.62359	-0.40988
936		H	-6.64659	-2.33751	0.23159
937		H	-5.71068	-0.831117	0.22114
938		H	-6.85119	-1.16738	-1.08538
939		C	-4.27461	-1.29638	-2.11337
940		H	-3.85885	-0.470116	-1.53629
941		H	-3.45825	-1.7658	-2.67431
942		H	-4.97684	-0.868495	-2.83859
943		C	2.4222	-2.71217	-1.20297
944		H	1.9477	-1.83844	-0.755624
945		H	2.77091	-2.43568	-2.20469
946		H	1.64985	-3.48221	-1.31677
947
948	5o-AP2
949		C	-1.10681	3.73163	0.700807
950		C	-0.738988	2.27836	0.453105
951		C	0.490186	2.21776	-0.135024
952		C	1.06045	3.59717	-0.363876
953		C	-0.154932	4.53258	-0.218923
954		C	-1.6533	1.18969	0.758075
955		C	-2.66272	1.10745	1.71195
956		S	-1.61379	-0.271241	-0.225645
957		C	-3.38054	-0.120961	1.62165
958		C	-2.9719	-0.962798	0.617032
959		H	-4.17084	-0.3813	2.31724
960		C	1.29818	1.03801	-0.459099
961		C	1.67082	0.558085	-1.69653
962		S	2.01543	0.09199	0.832965
963		C	2.52326	-0.586852	-1.58846
964		C	2.82947	-0.958645	-0.304833
965		H	2.87542	-1.13726	-2.45458
966		C	3.57381	-2.15216	0.188238
967		C	4.98957	-2.30176	0.229884
968		C	3.26165	-4.39426	1.12562
969		C	5.47245	-3.52986	0.716819
970		C	4.64175	-4.55933	1.15586
971		H	2.5943	-5.18118	1.46591
972		H	6.5403	-3.69737	0.76709
973		H	5.0815	-5.48289	1.52339
974		C	-3.40486	-2.3551	0.310791
975		C	-4.59187	-2.73271	-0.379661
976		C	-2.517	-3.34607	0.770656
977		C	-4.81036	-4.11359	-0.533114
978		C	-2.76511	-4.70273	0.594826
979		H	-1.61841	-3.02596	1.29059
980		C	-3.9293	-5.08529	-0.061662
981		H	-5.69855	-4.45568	-1.04787
982		H	-2.06155	-5.44181	0.967591
983		H	-4.15823	-6.13645	-0.216327
984		C	-5.63986	-1.7385	-0.948845
985		C	-3.0004	2.12453	2.77295
986		H	-2.10756	2.52991	3.25347
987		H	-3.5531	2.97194	2.35363
988		H	-3.62555	1.66498	3.54412
989		C	1.21624	1.11471	-3.01995
990		H	0.452283	1.88516	-2.89731
991		H	2.05371	1.56429	-3.56705
992		H	0.802096	0.319441	-3.65098
993		F	-0.870032	4.1085	1.99567
994		F	-2.40577	4.01507	0.425148
995		F	0.156373	5.74385	0.281617
996		F	-0.743336	4.69561	-1.43131
997		F	2.00222	3.91442	0.573844
998		F	1.65262	3.74019	-1.58091
999		C	6.00791	-1.22452	-0.232019
1000		C	2.74675	-3.19563	0.644889
1001		H	1.67108	-3.04892	0.603424
1002		C	6.00897	-1.12409	-1.77717
1003		H	6.78656	-0.423527	-2.1062
1004		H	6.21821	-2.09886	-2.23304
1005		H	5.05342	-0.763314	-2.16173
1006		C	7.45169	-1.57742	0.19652
1007		H	7.53879	-1.70847	1.28102
1008		H	7.8268	-2.48276	-0.29288
1009		H	8.11791	-0.757794	-0.093088
1010		C	-6.64993	-2.44294	-1.88503
1011		H	-6.15252	-2.95526	-2.71629
1012		H	-7.27782	-3.1687	-1.35707
1013		H	-7.32136	-1.6908	-2.31273
1014		C	-6.45847	-1.11121	0.206088
1015		H	-6.92951	-1.88808	0.819451
1016		H	-5.83772	-0.491073	0.85521
1017		H	-7.25353	-0.474411	-0.201295
1018		C	-4.97762	-0.618468	-1.78536
1019		H	-4.35345	0.043462	-1.18457
1020		H	-4.35804	-1.03838	-2.58622
1021		H	-5.75541	-0.001924	-2.25137
1022		C	5.69785	0.162376	0.379067
1023		H	4.75885	0.581801	0.017619
1024		H	5.64926	0.10958	1.47287
1025		H	6.49561	0.865897	0.112612
1026
1027	6o-AP1
1028		C	-1.2351	3.18702	-0.005245
1029		C	-0.010205	4.11549	-0.186317
1030		C	1.19738	3.21594	0.175784
1031		C	0.678148	1.7958	0.106131
1032		C	-0.675888	1.78293	-0.076699
1033		C	1.59266	0.685629	0.330553
1034		C	-1.57778	0.668292	-0.317127
1035		C	3.59904	-0.846712	0.332216
1036		C	1.4299	-0.4162	1.1569
1037		C	-1.42304	-0.413879	-1.16894
1038		C	-3.58995	-0.85458	-0.341154
1039		C	-4.90596	-1.50142	-0.102976
1040		C	-7.39861	-2.74963	0.333384
1041		C	-6.03455	-1.10277	-0.852239
1042		C	-5.02354	-2.52291	0.864532
1043		C	-6.26774	-3.12852	1.06192
1044		C	-7.25789	-1.73863	-0.621086
1045		H	-6.35444	-3.91797	1.80592
1046		H	-8.12429	-1.435	-1.20537
1047		C	4.91603	-1.49102	0.091044
1048		C	7.40945	-2.73521	-0.353234
1049		C	6.03629	-1.12158	0.867169
1050		C	5.04238	-2.48144	-0.90716
1051		C	6.28661	-3.08582	-1.10792
1052		C	7.26019	-1.75475	0.631259
1053		H	6.37984	-3.85154	-1.87557
1054		H	8.12016	-1.47349	1.2359
1055		C	-0.23196	-0.670501	-2.05075
1056		H	0.266645	0.259315	-2.33788
1057		H	-0.538028	-1.19092	-2.96441
1058		H	0.516285	-1.29453	-1.54583
1059		C	0.237052	-0.689387	2.03169
1060		H	-0.263455	0.234257	2.33433
1061		H	0.54406	-1.2239	2.93692
1062		H	-0.509094	-1.30752	1.51664
1063		F	-1.81672	3.42196	1.21393
1064		F	-2.17832	3.43576	-0.947996
1065		F	0.07395	4.48958	-1.48598
1066		F	-0.077925	5.22042	0.582733
1067		F	2.23287	3.43732	-0.686905
1068		F	1.6501	3.52105	1.42379
1069		C	-2.57046	-1.26468	-1.16257
1070		C	2.5735	-1.27135	1.1384
1071		S	3.17732	0.661215	-0.43642
1072		S	-3.15297	0.630241	0.465403
1073		H	2.63724	-2.17828	1.73202
1074		H	-2.64174	-2.15822	-1.7753
1075		C	-3.83273	-2.97146	1.68153
1076		H	-3.04138	-3.38889	1.04786
1077		H	-3.38645	-2.13724	2.23561
1078		H	-4.12432	-3.7389	2.4049
1079		C	5.93259	-0.066871	1.94567
1080		H	5.69289	0.917748	1.52687
1081		H	5.14122	-0.301962	2.66615
1082		H	6.87558	0.023064	2.4932
1083		C	-8.73986	-3.39673	0.587905
1084		H	-8.62795	-4.42961	0.934456
1085		H	-9.30165	-2.854	1.35999
1086		H	-9.35845	-3.40658	-0.315809
1087		C	-5.93992	-0.014723	-1.89795
1088		H	-5.6923	0.955547	-1.45122
1089		H	-5.15757	-0.229224	-2.63454
1090		H	-6.88885	0.095073	-2.43142
1091		C	3.86027	-2.89872	-1.75288
1092		H	3.05854	-3.33062	-1.14234
1093		H	3.42558	-2.04576	-2.28729
1094		H	4.15743	-3.64565	-2.49522
1095		C	8.75139	-3.37948	-0.611343
1096		H	9.32305	-2.81761	-1.3622
1097		H	9.36025	-3.41637	0.298251
1098		H	8.64006	-4.40205	-0.987477
1099
1100	6o-P1
1101		C	0.85271	3.61956	-0.531276
1102		C	-0.387051	4.42824	-0.973219
1103		C	-1.53663	3.7982	-0.153432
1104		C	-1.06655	2.38598	0.131636
1105		C	0.293479	2.32119	0.00409
1106		C	-2.01203	1.30981	0.390778
1107		C	1.18848	1.23464	0.374934
1108		C	-3.22753	-0.903576	0.293133
1109		C	-3.23818	1.336	1.04126
1110		C	1.21536	0.524104	1.56526
1111		C	3.02103	-0.495094	0.441712
1112		C	4.17127	-1.38327	0.132387
1113		C	6.35074	-3.08325	-0.434015
1114		C	5.48782	-0.960233	0.417872
1115		C	3.94393	-2.6552	-0.436787
1116		C	5.03903	-3.48118	-0.706337
1117		C	6.55135	-1.82134	0.131969
1118		H	4.86061	-4.46262	-1.1414
1119		H	7.56451	-1.49577	0.359608
1120		C	-3.63825	-2.30803	0.036088
1121		C	-4.44391	-4.96948	-0.442017
1122		C	-3.25256	-3.33235	0.927672
1123		C	-4.4258	-2.61355	-1.09541
1124		C	-4.815	-3.93887	-1.31002
1125		C	-3.66652	-4.64296	0.672425
1126		H	-5.42607	-4.1708	-2.18009
1127		H	-3.37412	-5.42933	1.36556
1128		C	0.299043	0.753145	2.73571
1129		H	-0.045629	1.79034	2.78128
1130		H	0.812324	0.521665	3.67497
1131		H	-0.593643	0.11705	2.67871
1132		C	-3.8495	2.51365	1.7568
1133		H	-3.10411	3.1011	2.297
1134		H	-4.60235	2.17074	2.47306
1135		H	-4.34262	3.19265	1.05175
1136		F	1.70358	3.429	-1.58122
1137		F	1.54445	4.3088	0.420124
1138		F	-0.254739	5.75199	-0.756858
1139		F	-0.62126	4.22069	-2.29228
1140		F	-1.69169	4.5262	1.00005
1141		F	-2.71376	3.85756	-0.825699
1142		C	2.25627	-0.451151	1.58062
1143		C	-3.90268	0.074048	0.978906
1144		S	-1.7079	-0.283507	-0.295348
1145		S	2.47524	0.704801	-0.700469
1146		H	-4.86895	-0.101703	1.44163
1147		H	2.44233	-1.09977	2.43126
1148		C	2.54522	-3.13518	-0.752391
1149		H	1.92395	-3.19267	0.148819
1150		H	2.03154	-2.45677	-1.44352
1151		H	2.5691	-4.1288	-1.21004
1152		C	-2.41165	-3.03557	2.14896
1153		H	-1.42037	-2.65538	1.87358
1154		H	-2.87685	-2.27293	2.78393
1155		H	-2.26875	-3.93759	2.7516
1156		C	7.51992	-3.98099	-0.76524
1157		H	7.24202	-5.03892	-0.709722
1158		H	7.88706	-3.79462	-1.78347
1159		H	8.36	-3.81407	-0.082632
1160		C	5.76268	0.394957	1.02969
1161		H	5.4622	1.20946	0.359906
1162		H	5.20762	0.536863	1.96377
1163		H	6.82858	0.514977	1.2457
1164		C	-4.85458	-1.5375	-2.06726
1165		H	-5.45289	-0.762404	-1.57495
1166		H	-3.99175	-1.03027	-2.51471
1167		H	-5.45323	-1.96257	-2.87846
1168		C	-4.85099	-6.39872	-0.714152
1169		H	-4.1117	-6.90801	-1.3469
1170		H	-4.93616	-6.97517	0.213112
1171		H	-5.81286	-6.44963	-1.23543
1172
1173	6o-AP2
1174		C	-1.23065	3.77046	-0.400923
1175		C	-2.75605	3.89106	-0.230713
1176		C	-3.10642	2.67875	0.664045
1177		C	-2.01033	1.66489	0.377963
1178		C	-0.956423	2.29705	-0.213688
1179		C	-2.18127	0.247734	0.656498
1180		C	0.357918	1.76258	-0.586206
1181		C	-2.08983	-2.27224	0.483072
1182		C	-2.9877	-0.391694	1.59361
1183		C	0.889455	1.58691	-1.84579
1184		C	2.74769	0.965263	-0.528874
1185		C	4.10474	0.518335	-0.120157
1186		C	6.68851	-0.332249	0.631804
1187		C	4.38381	-0.860758	0.011729
1188		C	5.11664	1.47047	0.123977
1189		C	6.39064	1.02466	0.493301
1190		C	5.6699	-1.25844	0.383791
1191		H	7.17038	1.76113	0.676508
1192		H	5.88208	-2.32159	0.481628
1193		C	-1.79766	-3.67864	0.103865
1194		C	-1.25816	-6.35789	-0.597012
1195		C	-0.817043	-4.40691	0.809212
1196		C	-2.51117	-4.28896	-0.95261
1197		C	-2.22852	-5.61679	-1.27993
1198		C	-0.566983	-5.73428	0.443299
1199		H	-2.78354	-6.08582	-2.09032
1200		H	0.189622	-6.29417	0.989179
1201		C	0.152323	1.81307	-3.1395
1202		H	-0.899964	2.05237	-2.97288
1203		H	0.203898	0.920883	-3.77494
1204		H	0.59447	2.6428	-3.70423
1205		C	-3.84499	0.250642	2.65537
1206		H	-3.33691	1.08182	3.14801
1207		H	-4.10908	-0.488857	3.41703
1208		H	-4.77545	0.646119	2.23446
1209		F	-0.829053	4.24333	-1.61211
1210		F	-0.598314	4.52465	0.547459
1211		F	-3.14714	5.06394	0.304093
1212		F	-3.35562	3.73753	-1.43916
1213		F	-3.09714	3.09218	1.96942
1214		F	-4.35426	2.21798	0.39122
1215		C	2.24348	1.12496	-1.79288
1216		C	-2.91487	-1.81065	1.47735
1217		S	-1.33857	-0.93577	-0.341894
1218		S	1.53349	1.38172	0.660449
1219		H	-3.4714	-2.47801	2.128
1220		H	2.83086	0.916728	-2.6822
1221		C	4.85161	2.95282	-0.012903
1222		H	4.47523	3.20459	-1.01081
1223		H	4.09539	3.29686	0.702482
1224		H	5.7654	3.52887	0.161399
1225		C	-0.042479	-3.78536	1.94959
1226		H	0.462679	-2.8625	1.6421
1227		H	-0.698568	-3.51876	2.78643
1228		H	0.716851	-4.47745	2.32588
1229		C	8.0661	-0.793192	1.04755
1230		H	8.78139	0.035254	1.05066
1231		H	8.0542	-1.22448	2.05694
1232		H	8.45016	-1.56763	0.372874
1233		C	3.32083	-1.90368	-0.249131
1234		H	2.44249	-1.7536	0.389473
1235		H	2.96277	-1.86634	-1.28436
1236		H	3.70832	-2.90972	-0.061874
1237		C	-3.5728	-3.53515	-1.72165
1238		H	-4.32886	-3.10879	-1.05278
1239		H	-3.14619	-2.69804	-2.28702
1240		H	-4.0799	-4.19478	-2.43219
1241		C	-0.969486	-7.79007	-0.982269
1242		H	-0.563546	-7.85535	-1.99975
1243		H	-0.242594	-8.24826	-0.30441
1244		H	-1.88006	-8.40115	-0.961246
